# Supplementary material
Source: MDPI journal article supplement (https://www.mdpi.com/2311-7524/8/3/222)
Supplement: s1 [file s1]

# Development and Cross-species Transferability of Novel Genomic-SSR Markers and Their Utility in Hybrid Identification and Trait Association Analysis in Chinese Cherry

Zhenshan Liu <sup>1,a</sup>, Jing Zhang <sup>1,a</sup>, Yan Wang <sup>1,\*</sup>, Hao Wang<sup>1</sup>, Lei Wang<sup>1</sup>, Lu Zhang<sup>1</sup>, Muran Xiong<sup>2</sup>, Wen He<sup>1</sup>, Shaofeng Yang<sup>1</sup>, Qing Chen<sup>2</sup>, Tao Chen<sup>3</sup>, Ya Luo<sup>2</sup>, Yong Zhang<sup>2</sup>, Haoru Tang<sup>1,2</sup>, Xiaorong Wang<sup>1,2\*</sup>

<sup>1</sup> Institute of Pomology and Olericulture, Sichuan Agricultural University, Chengdu, 611130, China; l33yona@163.com (Z.L.); 71281@sicau.edu.cn (J.Z.); wh2sky@163.com (H.W.); ewlei@163.com (L.W.); zl@stu.sicau.edu.cn (L.Z.); hewen@sicau.edu.cn (W.H.); 71175@sicau.edu.cn (S.Y.); htang@sicau.edu.cn (H.T.)

<sup>2</sup> College of Horticulture, Sichuan Agricultural University, Chengdu, 611130, China; sdbiwork@163.com (M.X.); supnovel@sicau.edu.cn (Q.C.); zhyong@sicau.edu.cn (Y.Z.); 13621@sicau.edu.cn (Y.L.)

<sup>3</sup> College of Life Science, Sichuan Agricultural University, Ya'an, 625000, China; chentao293@163.com (T.C.)

\* Correspondence: wangxr@sicau.edu.cn, wangyanwxy@sicau.edu.cn.

<sup>a</sup> These authors contributed equally to this work

**Table S1.** F<sub>1</sub> populations and their parents' phenotype characters.

| Mating design<br>(♀×♂) | Code range                   | F <sub>1</sub><br>populations<br>(n) | Parents phenotype characters                                                                                                                                                                                                |
|------------------------|------------------------------|--------------------------------------|-----------------------------------------------------------------------------------------------------------------------------------------------------------------------------------------------------------------------------|
| NZH × HF               | NH528~NH710,<br>NH931~NH1020 | 211                                  | NZH: Early-matured, medium fruit size (3.8~4.5 g), light flavor (11.5~13.5% TSS, 0.75 g·100mL <sup>-1</sup> titratable acid), kidney shape, orange red peel color; susceptible to gummosis disease.                         |
| HF × NZH               | HN711~HN920                  | 145                                  | HF: Large fruit size (4.5~5.5 g), full-flavored (14.5~16.2% TSS, 17.74 mg·100mL <sup>-1</sup> vitamin C, 0.51 g·100mL <sup>-1</sup> titratable acid), heart shape, purple red peel color; susceptible to shot hole disease. |
| HF × PJHH              | HP1~HP526,<br>HP1041~HP1860  | 766                                  | PJHH: Semi-wild, intensive adaptability and disease/pest resistance, very small fruit size (1.5~2.5 g), flat round shape, red peel color, sour-sweet flavor (11.5~13.2% TSS, 0.79 g·100mL <sup>-1</sup> titratable acid)    |
| Total                  |                              | 1122                                 |                                                                                                                                                                                                                             |

**Note:** NZH: Nanzaohong; HF: Hongfei; PJHH: Pujianghonghua.

**Table S2.** List of information for each accession in this study.

| Taxon                              | Accession no. | Name  | Locality (latitude N/Longitude E/Altitude (m)) | Sequencing results |            | FLD (cm) | FTD (cm) | TSS (%) |
|------------------------------------|---------------|-------|------------------------------------------------|--------------------|------------|----------|----------|---------|
|                                    |               |       |                                                | Clean Bases (bp)   | Mean depth |          |          |         |
| <i>Cerasus</i>                     |               |       |                                                |                    |            |          |          |         |
| Subg. <i>Cerasus</i> (CER)         |               |       |                                                |                    |            |          |          |         |
| <i>C. pseudocerasus</i> (landrace) | 1             | CAN2  | Anning, Yunnan                                 |                    |            |          |          |         |
|                                    | 2             | CES1  | Eshan, Yunnan                                  |                    |            | 1.33     | 1.48     | 23.00   |
|                                    | 3             | CFM2  | Fumin, Yunnan                                  |                    |            | 1.33     | 1.48     | NA      |
|                                    | 4             | CJN1  | Jinning, Yunnan                                |                    |            | 1.43     | 1.52     | 20.00   |
|                                    | 5             | CMZ3  | Mengzi, Yunnan                                 |                    |            | 1.46     | 1.77     | 20.73   |
|                                    | 6             | CYiL1 | Yiliang, Yunnan                                |                    |            |          |          |         |
|                                    | 7             | CYiL2 |                                                |                    |            |          |          |         |
|                                    | 8             | CYX3  | Yuxi, Yunnan                                   |                    |            |          |          |         |
|                                    | 9             | CYX4  | (24°15.545'/102°28.895'/1644-1769)             | 1722435300         | 5.74       | 1.49     | 1.51     | 27.70   |
|                                    | 10            | CYX6  |                                                |                    |            | 1.50     | 1.57     | 24.00   |
|                                    | 11            | CZT1  | Zhaotong, Yunnan                               |                    |            |          |          |         |
|                                    | 12            | CZT2  |                                                |                    |            | 1.48     | 1.76     | 19.70   |
|                                    | 13            | CZT3  |                                                |                    |            |          |          |         |
|                                    | 14            | CHC   | Miyi, Sichuan                                  |                    |            |          |          |         |
|                                    | 15            | CHF   | Xinjin, Sichuan                                |                    |            |          |          |         |
|                                    | 16            | CHY1  | Hanyuan, Sichuan                               |                    |            | 1.29     | 1.50     | 10.40   |
|                                    | 17            | CHY2  |                                                |                    |            | 1.26     | 1.43     | 7.60    |
|                                    | 18            | CHY3  |                                                |                    |            | 1.43     | 1.59     | 16.87   |
|                                    | 19            | CHY4  |                                                |                    |            | 1.38     | 1.53     | 13.10   |
|                                    | 20            | CHY5  |                                                |                    |            | 1.49     | 1.67     | 16.90   |
|                                    | 21            | CHY6  |                                                |                    |            | 1.41     | 1.58     | NA0     |
|                                    | 22            | CHZZ  | Xinjin, Sichuan                                |                    |            | 1.33     | 1.52     | NA      |
|                                    | 23            | CJY1  | Jianyang, Sichuan                              |                    |            | 1.56     | 1.83     | 17.50   |
|                                    | 24            | CJY4  |                                                |                    |            |          |          |         |
|                                    | 25            | CLD3  | Luding, Sichuan                                |                    |            | 1.22     | 1.37     | 20.50   |
|                                    | 26            | CLoQ  | Longquan, Sichuan                              |                    |            |          |          |         |
|                                    | 27            | CMY2  | Miyi, Sichuan                                  |                    |            | 1.46     | 1.55     | 18.70   |
|                                    | 28            | CMY3  |                                                |                    |            | 1.34     | 1.63     | 33.23   |
|                                    | 29            | CMY4  |                                                |                    |            | 1.51     | 1.73     | 29.70   |
|                                    | 30            | CMY5  |                                                |                    |            | 1.60     | 1.97     | 29.00   |
|                                    | 31            | CNZH  | Xinjin, Sichuan                                |                    |            |          |          |         |
|                                    | 32            | CPJB1 | Pujiang, Sichuan                               |                    |            | 1.37     | 1.44     | NA      |
|                                    | 33            | CPJHH |                                                |                    |            | 1.38     | 1.44     | NA      |
|                                    | 34            | CPZB  | Pengzhou, Sichuan                              |                    |            | 1.48     | 1.74     | 15.33   |
|                                    | 35            | CPZH  |                                                |                    |            | 1.40     | 1.69     | 17.50   |
|                                    | 36            | CPZH2 |                                                |                    |            |          |          |         |
|                                    | 37            | CXC1  | Xichang, Sichuan                               | 2053758870         | 6.01       | 1.44     | 1.72     | 24.33   |
|                                    | 38            | CXC2  |                                                |                    |            | 1.36     | 1.52     | 19.50   |
|                                    | 39            | CXC3  |                                                |                    |            | 1.43     | 1.71     | 26.50   |
|                                    | 40            | CXC4  |                                                |                    |            | 1.02     | 1.34     | 31.00   |
|                                    | 41            | CAQ2  | Anqiu, Shandong                                |                    |            | 1.49     | 1.44     | 13.93   |
|                                    | 42            | CAQ3  |                                                |                    |            | 1.41     | 1.47     | 13.80   |
|                                    | 43            | CAQ4  |                                                |                    |            | 1.40     | 1.40     | 15.90   |
|                                    | 44            | CAQ5  |                                                |                    |            | 1.48     | 1.39     | 15.73   |
|                                    | 45            | CCL1  | Changle, Shandong                              |                    |            | 1.29     | 1.17     | 15.50   |
|                                    | 46            | CCY2  | Changyi, Shandong                              |                    |            |          |          |         |
|                                    | 47            | CHaY1 | Haiyang, Shandong                              |                    |            |          |          |         |
|                                    | 48            | CHaY3 |                                                |                    |            |          |          |         |

|                                   |    |                   |                                     |            |      |      |      |       |
|-----------------------------------|----|-------------------|-------------------------------------|------------|------|------|------|-------|
|                                   | 49 | CLaY2             | Laiyang, Shandong                   |            |      | 1.42 | 1.33 | 20.00 |
|                                   | 50 | CLiY3             | Linyin, Shandong                    |            |      |      |      |       |
|                                   | 51 | CLiY5             |                                     |            |      | 1.52 | 1.60 | 13.80 |
|                                   | 52 | CLiY6             |                                     |            |      | 1.38 | 1.44 | 16.67 |
|                                   | 53 | CWL1              | Wulian, Shandong                    |            |      | 1.29 | 1.18 | 15.97 |
|                                   | 54 | CWL2              |                                     |            |      | 1.56 | 1.55 | 16.37 |
|                                   | 55 | CZaZ1             | Zaozhuang, Shandong                 |            |      | 1.65 | 1.40 | 20.83 |
|                                   | 56 | CZaZ2             |                                     |            |      | 1.51 | 1.60 | 15.70 |
|                                   | 57 | CZaZ3             |                                     |            |      | 1.57 | 1.64 | 27.73 |
|                                   | 58 | CZaZ6             |                                     |            |      | 1.89 | 1.58 | 11.50 |
|                                   | 59 | CZaZ8             |                                     |            |      | 1.43 | 1.47 | 18.70 |
|                                   | 60 | CZaZ9             |                                     |            |      | 1.37 | 1.25 | 21.00 |
|                                   | 61 | CZC1              | Zhucheng, Shandong                  |            |      | 1.57 | 1.52 | 15.33 |
|                                   | 62 | CZC2              |                                     |            |      | 1.48 | 1.35 | 15.33 |
|                                   | 63 | CLuY1             | Luoyang, Henan                      |            |      |      |      |       |
|                                   | 64 | CLuY16            | (34°43.331'/112°18.155'/251-263)    |            |      |      |      |       |
|                                   | 65 | CLuY3             |                                     |            |      |      |      |       |
|                                   | 66 | CLuY4             |                                     |            |      | 1.61 | 1.48 | 18.00 |
|                                   | 67 | CLuY41            |                                     |            |      |      |      |       |
|                                   | 68 | CLuYg             |                                     |            |      |      |      |       |
|                                   | 69 | CZeZ1             | Zhengzhou, Henan                    |            |      | 1.41 | 1.51 | NA    |
|                                   | 70 | CZeZ9             |                                     |            |      | 1.37 | 1.25 | 21.00 |
|                                   | 71 | CAS1              | Anshun, Guizhou                     |            |      | 1.58 | 1.54 | 13.80 |
|                                   | 72 | CBJ2              | Bijie, Guizhou                      |            |      | 1.58 | 1.81 | 20.90 |
|                                   | 73 | CBJ3              | (27°18.761'/105°19.492'/1453-1500)  |            |      | 1.81 | 1.88 | 13.57 |
|                                   | 74 | CBJ4              |                                     | 965582820  | 3.22 | 1.62 | 1.54 | 31.80 |
|                                   | 75 | CBJ5              |                                     |            |      | 1.51 | 1.74 | 23.03 |
|                                   | 76 | CBJ6              |                                     |            |      | 1.61 | 1.71 | 28.33 |
|                                   | 77 | CBJ7 <sup>b</sup> |                                     | 1987875450 | 6.63 |      |      |       |
|                                   | 78 | CGuY1             | Guiyang, Guizhou                    |            |      | 1.47 | 1.54 | 23.00 |
|                                   | 79 | CGuY2             |                                     |            |      | 1.82 | 1.74 | 17.00 |
|                                   | 80 | CHeZ1             | Hezhang, Guizhou                    |            |      |      |      |       |
|                                   | 81 | CNY1              | Nayong, Guizhou                     |            |      |      |      |       |
|                                   | 82 | CPD3              | Puding, Guizhou                     |            |      | 1.79 | 1.82 | 14.70 |
|                                   | 83 | CWN1              | Weining, Guizhou                    |            |      | 1.39 | 1.32 | 23.00 |
|                                   | 84 | CWN2              |                                     |            |      | 1.30 | 1.50 | 24.00 |
|                                   | 85 | CZN1              | Zhenning, Guizhou                   |            |      | 1.42 | 1.38 | 17.00 |
|                                   | 86 | CZN2              |                                     |            |      | 1.33 | 1.34 | 18.50 |
|                                   | 87 | CZY1              | Zunyi, Guizhou                      |            |      |      |      |       |
|                                   | 88 | CZY2              |                                     |            |      | 1.47 | 1.58 | 12.50 |
|                                   | 89 | CZY3              |                                     |            |      |      |      |       |
|                                   | 90 | CXJ4              | Xianju, Zhejiang                    |            |      |      |      |       |
|                                   | 91 | CBLHZZ            | Banan, Chongqing                    |            |      | 1.16 | 1.17 | 18.50 |
|                                   | 92 | CTH2              | Taihe, Anhui                        |            |      | 1.33 | 1.24 | NA    |
|                                   | -  | CQhzz             | Chongqing                           | 1219313880 | 4.06 |      |      |       |
|                                   |    |                   | (29°56.301'/106°55.156'/240-284)    |            |      |      |      |       |
|                                   | -  | CPZB2             | Pengzhou, Sichuan                   | 2053758870 | 6.85 |      |      |       |
|                                   |    |                   | (31°11.988'/103°50.010'/1011-1028)  |            |      |      |      |       |
| <i>C. pseudocerasus</i><br>(wild) | 93 | WBZ               | Bazhong, Sichuan                    |            |      |      |      |       |
|                                   | 94 | WBN               | Ba'nan, Chongqing                   |            |      |      |      |       |
|                                   | -  | WQX13             | Qingxi, Sichuan                     | 1862509950 | 6.21 |      |      |       |
|                                   |    |                   | (32°24.086'/104°24.076'/1285-1467)  |            |      |      |      |       |
| <i>C. avium</i>                   | 95 | Van               | Zhengzhou Fruit Research Institute, |            |      |      |      |       |
|                                   | 96 | Zaodaguo          | Chinese Academy of Agricultural     |            |      |      |      |       |
|                                   | 97 | Mazzard           | Sciences (ZFRI, CAAS)               |            |      |      |      |       |

|                                             |     |                |                                   |
|---------------------------------------------|-----|----------------|-----------------------------------|
|                                             | 98  | Stella         |                                   |
| <i>C. avium</i> × <i>C. pseudocerasus</i>   | 99  | Landing 2      |                                   |
| <i>C. vulgaris</i> × <i>P./C. canescens</i> | 100 | Gisela 6       |                                   |
| <i>C. vulgaris</i>                          | 101 | -              |                                   |
|                                             | 102 | ZY-1           |                                   |
| <i>C. campanulata</i>                       | 103 | -              | Chengdu Botanical Garden, Sichuan |
| <i>C. yedoensis</i>                         | 104 | Yoshino cherry |                                   |
| <i>C. serrulata</i>                         | 105 | -              |                                   |
| <i>C. cerasoides</i>                        | 106 | -              |                                   |
| <i>C. mahaleb</i>                           | 107 | -              | ZFRI, CAAS                        |
| <b>Subg. <i>Microcerasus</i> (MIC)</b>      |     |                |                                   |
| <i>C. humilis</i>                           | 108 | -              | ZFRI, CAAS                        |
| <i>C. glandulosa</i>                        | 109 | -              |                                   |
| <i>C. japonica</i>                          | 110 | -              |                                   |
| <i>C. tomentosa</i>                         | 111 | -              |                                   |
| <b><i>Armeniaca</i> (ARM)</b>               |     |                |                                   |
| <i>Armeniaca mume</i>                       | 112 | -              | Chengdu Botanical Garden, Sichuan |
| <b><i>Amygdalus</i> (AMY)</b>               |     |                |                                   |
| <i>Amygdalus persica</i>                    | 113 | -              | Chengdu Botanical Garden, Sichuan |
| <i>Amygdalus triloba</i>                    | 114 | -              |                                   |

Note: Name in bold and green: whole genome sequencing accession; Name in bold and red: whole-genome resequencing accessions; NA, data missing; -, represents the name is unknown; FLD: fruit longitudinal diameter; FTD: fruit transverse diameter; TSS: total solid content. Accession no.112-114 were only used to test the transferability of SAUCps203, the species-specific marker.

**Table S3.** Information of five SSR markers for hybrids identification

| Marker    | Primer sequence (5'-3')                                 | Repeat motif |
|-----------|---------------------------------------------------------|--------------|
| SAUCps303 | F: TCTTTCCAAACTCCCTTCATCTCC; R: TCCCAGCATCATCATTCAACTCT | CT           |
| SAUCps102 | F: TCAGTGAGGCAGTAAGGAAC; R: ATGGCGTCTACACGGTAAT         | AT           |
| SAUCps706 | F: GCCATTTCGTTTATTCCCTTT; R: TTTCTCCGTGCTCTCTCTGTTT     | CTCTA        |
| SAUCps202 | F: CCACTTGCTCTTCTATCTTCTT; R: GCCCACCATCCACATCAA        | GAA          |
| SAUCps304 | F: AGATGTCCTCGTGTTGTAAGC; R: CGTAGTTGGTCAGTTGGTCA       | TTA          |

**Table S4.** Characteristics of 39 microsatellite loci across 94 Chinese cherry accessions.

| <b>Marker</b> | <b>MAF</b> | <b>Genotype No.</b> | <b><i>Na</i></b> | <b><i>Ne</i></b> | <b><i>Ho</i></b> | <b><i>He</i></b> | <b><i>PIC</i></b> |
|---------------|------------|---------------------|------------------|------------------|------------------|------------------|-------------------|
| SAUCps101     | 0.935      | 4                   | 3                | 1.140            | 0.090            | 0.123            | 0.117             |
| SAUCps305     | 0.690      | 5                   | 4                | 1.885            | 0.100            | 0.472            | 0.417             |
| SAUCps503     | 0.645      | 5                   | 3                | 2.075            | 0.090            | 0.521            | 0.462             |
| SAUCps602     | 0.450      | 6                   | 3                | 2.807            | 0.610            | 0.647            | 0.570             |
| SAUCps704     | 0.640      | 5                   | 3                | 1.891            | 0.140            | 0.474            | 0.373             |
| SAUCps705     | 0.895      | 3                   | 2                | 1.232            | 0.110            | 0.189            | 0.170             |
| SAUCps801     | 0.780      | 6                   | 4                | 1.545            | 0.010            | 0.354            | 0.333             |
| SAUCps807     | 0.680      | 4                   | 4                | 1.790            | 0.530            | 0.444            | 0.353             |
| SAUCps601     | 0.815      | 7                   | 5                | 1.468            | 0.210            | 0.320            | 0.296             |
| SAUCps202     | 0.445      | 9                   | 5                | 2.783            | 0.180            | 0.644            | 0.574             |
| SAUCps703     | 0.575      | 3                   | 2                | 1.956            | 0.030            | 0.491            | 0.369             |
| SAUCps502     | 0.535      | 7                   | 4                | 2.549            | 0.120            | 0.611            | 0.541             |
| SAUCps204     | 0.835      | 3                   | 2                | 1.380            | 0.250            | 0.277            | 0.238             |
| SAUCps605     | 0.815      | 4                   | 3                | 1.439            | 0.010            | 0.307            | 0.264             |
| SAUCps402     | 0.765      | 10                  | 5                | 1.610            | 0.101            | 0.381            | 0.364             |
| SAUCps504     | 0.625      | 4                   | 2                | 1.871            | 0.374            | 0.468            | 0.372             |
| SAUCps301     | 0.550      | 7                   | 4                | 2.452            | 0.560            | 0.595            | 0.524             |
| SAUCps205     | 0.870      | 5                   | 4                | 1.308            | 0.020            | 0.237            | 0.224             |
| SAUCps203     | 0.980      | 5                   | 5                | 1.041            | 0.040            | 0.040            | 0.039             |
| SAUCps302     | 0.875      | 5                   | 3                | 1.288            | 0.030            | 0.225            | 0.207             |
| SAUCps401     | 0.600      | 5                   | 3                | 1.981            | 0.250            | 0.498            | 0.391             |
| SAUCps701     | 0.385      | 11                  | 6                | 4.081            | 0.130            | 0.759            | 0.720             |
| SAUCps806     | 0.385      | 6                   | 3                | 2.934            | 0.061            | 0.663            | 0.594             |
| SAUCps803     | 0.420      | 7                   | 4                | 2.843            | 0.440            | 0.652            | 0.575             |
| SAUCps802     | 0.445      | 9                   | 4                | 2.611            | 0.475            | 0.620            | 0.551             |
| SAUCps604     | 0.955      | 4                   | 2                | 1.031            | 0.010            | 0.031            | 0.085             |
| SAUCps607     | 0.475      | 8                   | 5                | 2.234            | 0.818            | 0.555            | 0.464             |
| SAUCps501     | 0.480      | 9                   | 4                | 2.768            | 0.313            | 0.642            | 0.581             |
| SAUCps606     | 0.670      | 7                   | 4                | 1.921            | 0.133            | 0.482            | 0.453             |
| SAUCps804     | 0.520      | 5                   | 3                | 2.014            | 0.323            | 0.506            | 0.396             |
| SAUCps702     | 0.770      | 8                   | 4                | 1.595            | 0.263            | 0.375            | 0.360             |
| SAUCps808     | 0.445      | 14                  | 6                | 3.124            | 0.152            | 0.683            | 0.637             |
| SAUCps206     | 0.465      | 10                  | 4                | 3.010            | 0.133            | 0.671            | 0.630             |
| SAUCps104     | 0.530      | 10                  | 5                | 2.387            | 0.153            | 0.584            | 0.527             |
| SAUCps805     | 0.805      | 6                   | 3                | 1.448            | 0.327            | 0.311            | 0.316             |
| SAUCps103     | 0.830      | 3                   | 2                | 1.238            | 0.215            | 0.193            | 0.276             |
| SAUCps603     | 0.735      | 8                   | 5                | 1.441            | 0.079            | 0.308            | 0.415             |
| SAUCps304     | 0.325      | 7                   | 4                | 3.289            | 0.139            | 0.700            | 0.728             |
| SAUCps201     | 0.315      | 8                   | 4                | 2.863            | 0.211            | 0.655            | 0.692             |
| mean          | 0.640      | 6.462               | 3.718            | 2.060            | 0.211            | 0.454            | 0.415             |

Note: *MAF*: major allele frequency, *Genotype No*: number of genotype, *Na*: number of alleles observed, *Ne*: effective number of alleles, *Ho*: observed heterozygosity, *He*: expected heterozygosity, *PIC*: polymorphism information content.

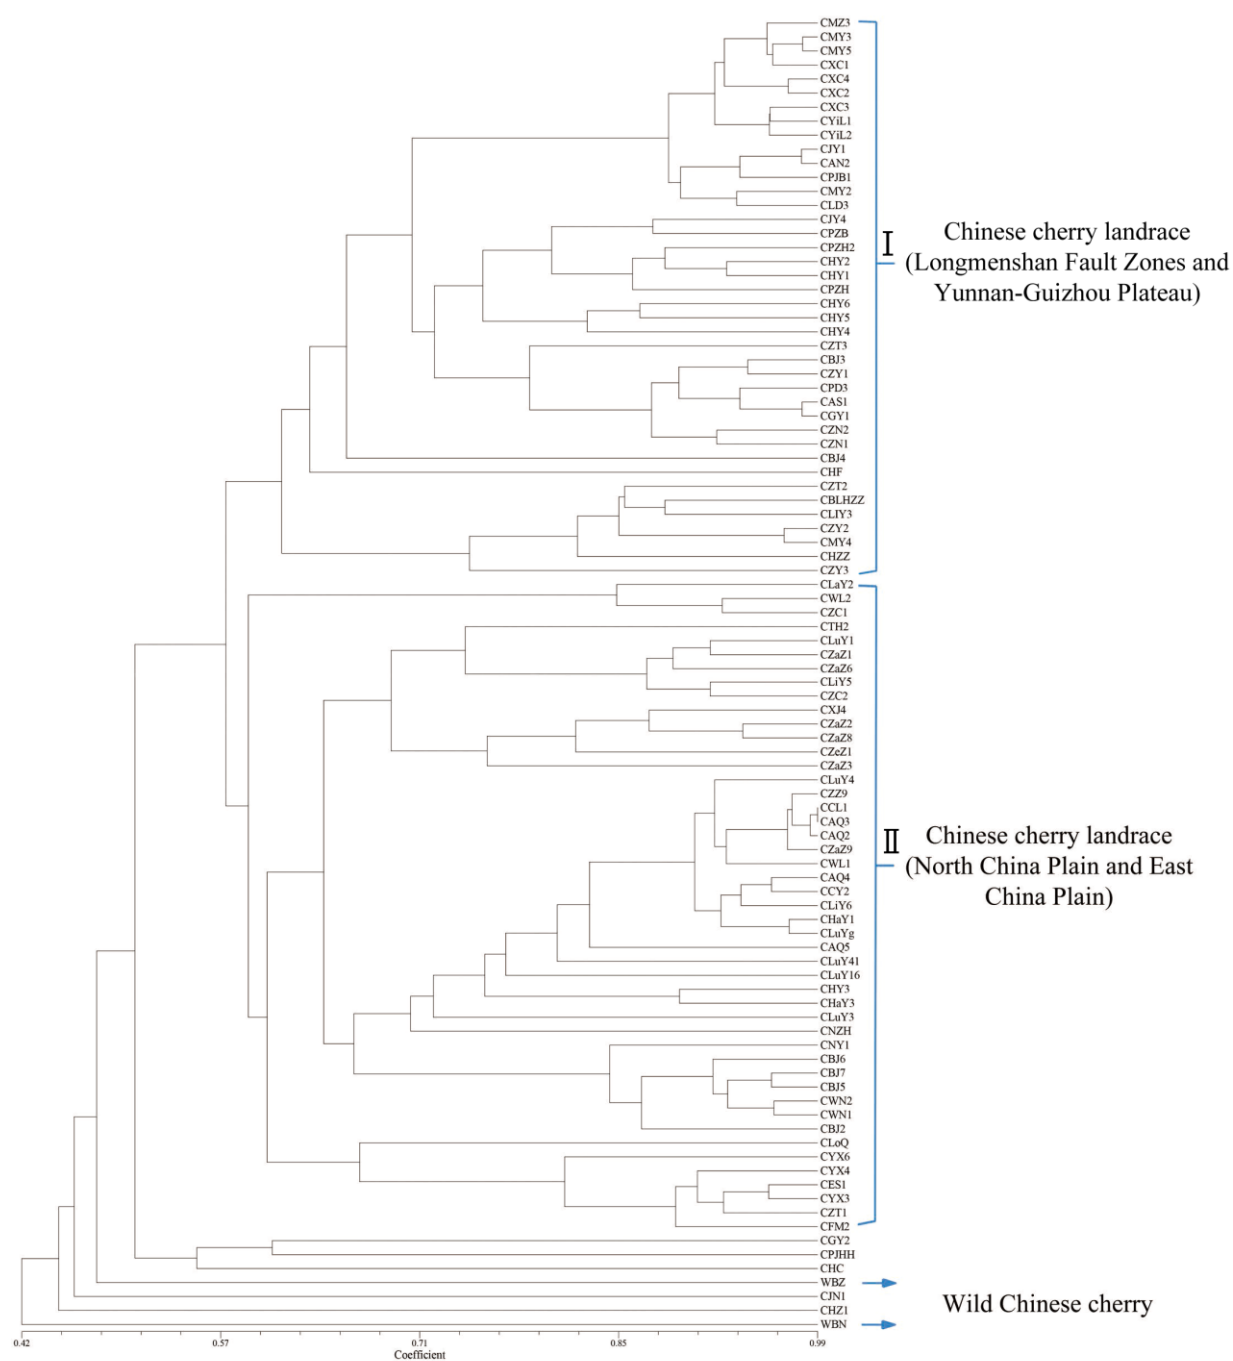

**Figure S1.** Phenograms by UPGMA cluster analysis of 94 Chinese cherry accessions.



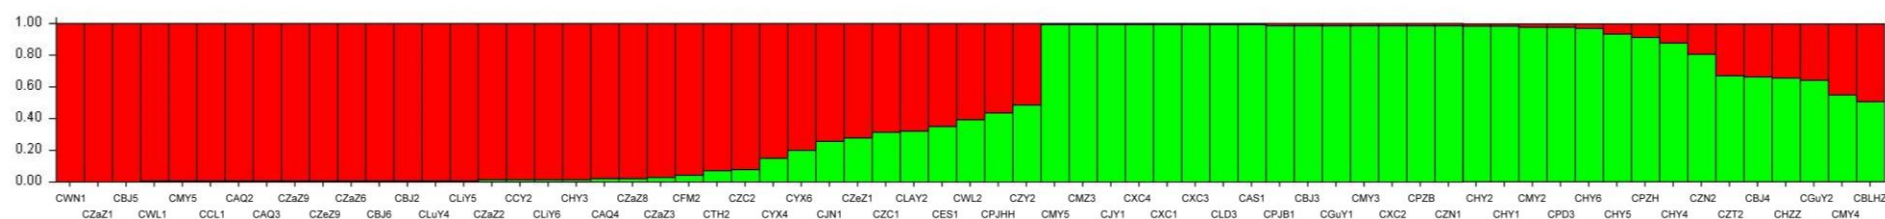

**Figure S2.** Population structure distribution of 65 Chinese cherry accessions.

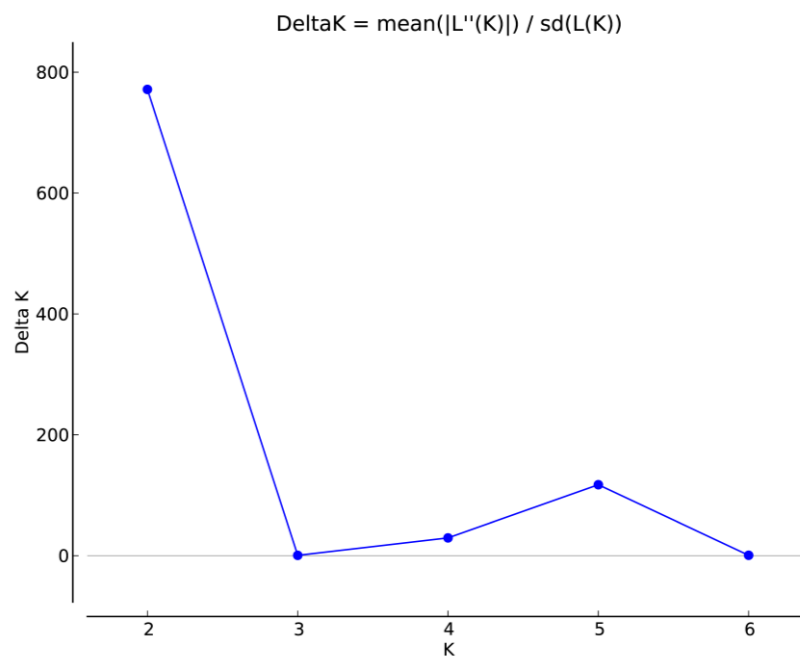

**Figure S3.** Curve diagram of K value.
